# Supplementary material for: Synthesis and Electrochemical Performance of Electrostatic Self-Assembled Nano-Silicon@N-Doped Reduced Graphene Oxide/Carbon Nanofibers Composite as Anode Material for Lithium-Ion Batteries
Source: MDPI journal article supplement (doi:10.3390/molecules26164831), 2021-08-10
Supplement: s1 [file s1]

Supplementary Materials

# Synthesis and Electrochemical Performance of Electrostatic Self-Assembled Nano-Silicon@N-Doped Reduced Graphene Oxide/Carbon Nanofibers Composite as Anode Material for Lithium-Ion Batteries

RuYe Cong <sup>1</sup>, Hyun-Ho Park <sup>1</sup>, Minsang Jo <sup>2</sup>, Hochun Lee <sup>2</sup> and Chang-Seop Lee <sup>1,\*</sup>

<sup>1</sup> Department of Chemistry, Keimyung University, Daegu 42601, Korea; cry79838@naver.com (R.C.); rubchem@kmu.ac.kr (H.-H.P.)

<sup>2</sup> Department of Energy Science and Engineering, DGIST, Daegu 42988, Korea; alstkdw@dgist.ac.kr (M.J.); dukelee@dgist.ac.kr (H.L.)

\* Correspondence: surfkm@kmu.ac.kr; Tel.: +82-53-580-5192

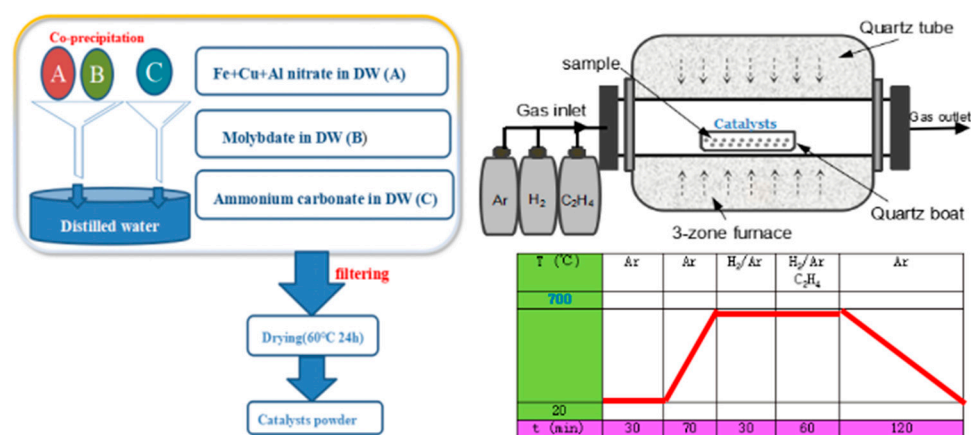

**Figure S1.** Process for preparing the catalysts and the synthesis of carbon nanofibers.

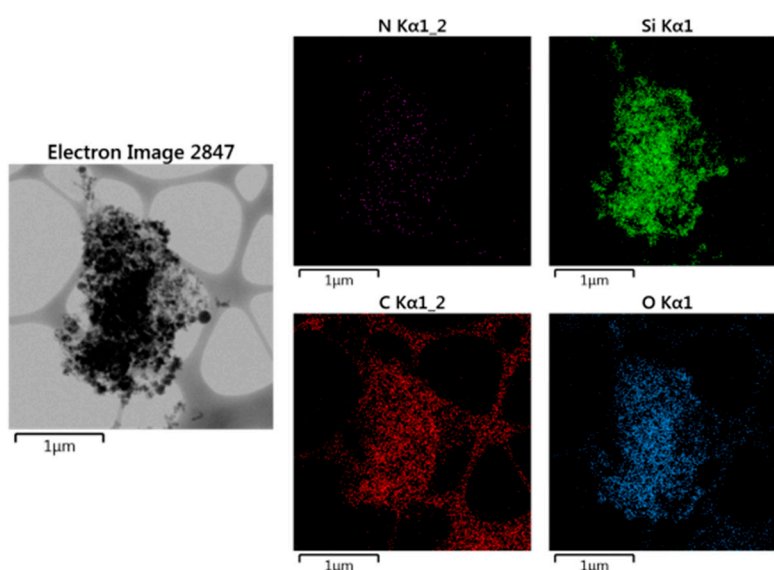

**Figure S2.** The EDS mapping of the Si, N, C, O elements on the surface of the Si@N-doped rGO/CNF composite.

**Table S1.** Raman spectroscopy results of the GO, rGO, CNFs, Si/rGO, and Si/CNF/rGO samples (see Figure 4(b)).

| Sample              | I <sub>D</sub> /I <sub>G</sub> |
|---------------------|--------------------------------|
| GO                  | 1.05                           |
| rGO                 | 0.96                           |
| CNF                 | 0.99                           |
| Si@APTES/N-doped GO | 1.03                           |
| Si/rGO              | 1.02                           |
| Si@N-doped rGO      | 1.00                           |
| Si@N-doped rGO/CNF  | 1.00                           |

**Table S2.** Discharge capacity, coulomb efficiency, and capacity retention rate of the Si/CNF/rGO, Si@N-doped rGO and Si@N-doped rGO/CNF composite electrodes.

| Samples            | Max. Discharge Capacity (mAh/g) | Discharge Capacity (mAh/g) |                 | Coulomb Efficiency (%) |           | Capacity Retention Rate (%) |                 |
|--------------------|---------------------------------|----------------------------|-----------------|------------------------|-----------|-----------------------------|-----------------|
|                    |                                 | After 37 Cycle             | After 100 Cycle | First Cycle            | 100 Cycle | After 37 Cycle              | After 100 Cycle |
| Si/CNF/rGO         | 3434.9                          | 1054.2                     | 964.7           | 51.7                   | 99.9      | 30.7                        | 26.5            |
| Si@N-doped rGO     | 3138.8                          | 1140.2                     | 1091.8          | 66.1                   | 99.5      | 36.3                        | 34.8            |
| Si@N-doped rGO/CNF | 2192.3                          | 1418.8                     | 1276.8          | 71.5                   | 99.9      | 64.7                        | 58.2            |
